# Supplementary material for: Quantum dot-induced improved performance of cadmium telluride (CdTe) solar cells without a Cu buffer layer
Source: Royal Society of Chemistry journal article supplement (doi:10.1039/c6ta10441j), 2017-01-01
Supplement: c6ta10441j1.pdf [file c6ta10441j1.pdf]

## Electronic Supplementary Information

# Quantum Dots-Induced Improved Performance of Cadmium Telluride (CdTe) Solar Cells without Cu Buffer Layer

Jiajie Li,<sup>a</sup> Yumin Zhang,<sup>a</sup> Tangling Gao,<sup>b</sup> Chang Hu,<sup>c</sup> Tai Yao,<sup>d</sup> Quan Yuan,<sup>a</sup> Xianjie Wang,<sup>c</sup> Ping Xu,<sup>\*e</sup> Zhihua Zhang,<sup>f</sup> Jikang Jian,<sup>g</sup> Xinghong Zhang<sup>\*a</sup> and Bo Song<sup>\*cd</sup>

---

<sup>a.</sup> Centre for Composite Materials and Structures, Harbin Institute of Technology, Harbin 150001, China. E-mail: zhangxh@hit.edu.cn

<sup>b.</sup> Institute of Petrochemistry, Heilongjiang Academy of Sciences, Harbin 150040, China.

<sup>c.</sup> Department of Physics, Harbin Institute of Technology, Harbin 150001, China.

<sup>d.</sup> Academy of Fundamental and Interdisciplinary Sciences, Harbin Institute of Technology, Harbin 150001, China. E-mail: songbo@hit.edu.cn

<sup>e.</sup> School of Chemistry and Chemical Engineering, Harbin Institute of Technology, Harbin 150001, China. E-mail: pxu@hit.edu.cn

<sup>f.</sup> Liaoning Key Materials Laboratory for Railway, School of Materials Science and Engineering, Dalian Jiaotong University, Dalian 116028, China.

<sup>g.</sup> School of Physics and Optoelectronic Engineering, Guangdong University of Technology, Guangzhou 510006, China.

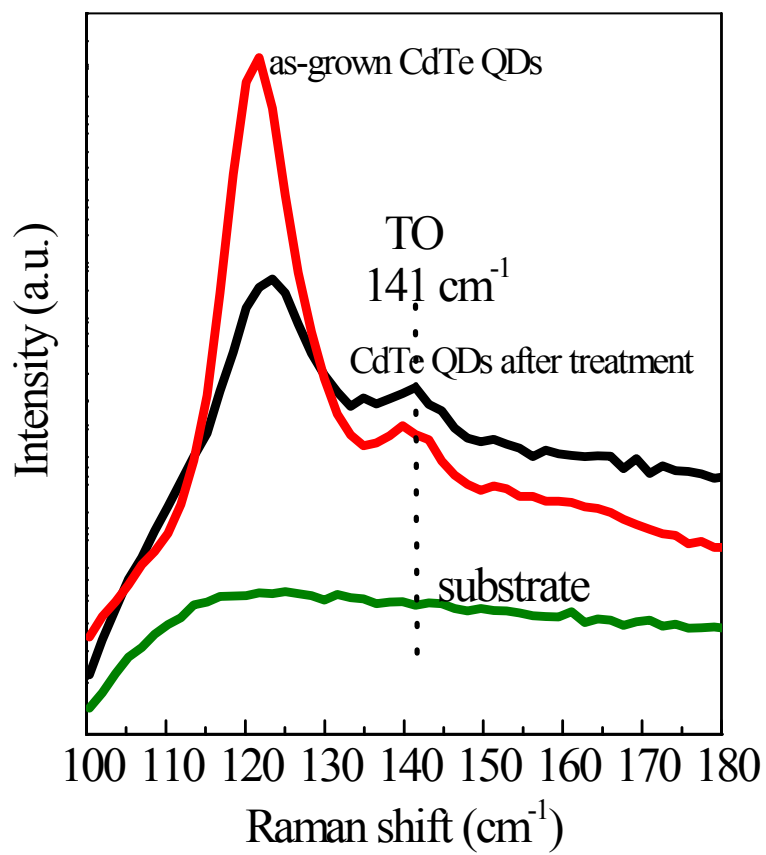

**Fig. S1** Raman spectra of CdTe QDs before and after thermal treatment

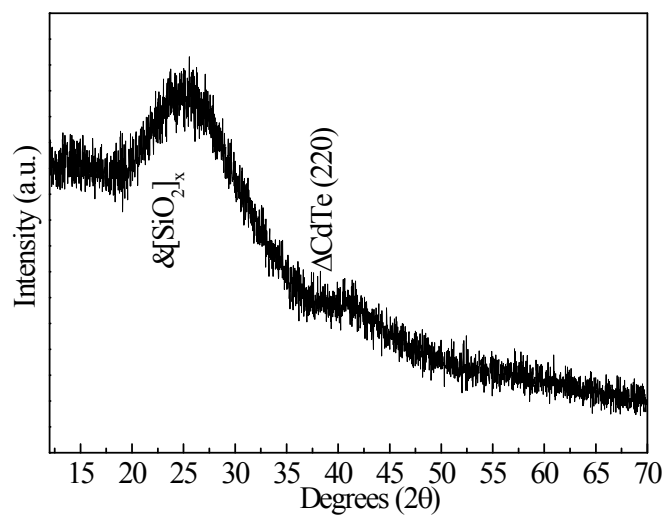

**Fig. S2** XRD pattern of the as-synthesized CdTe QDs

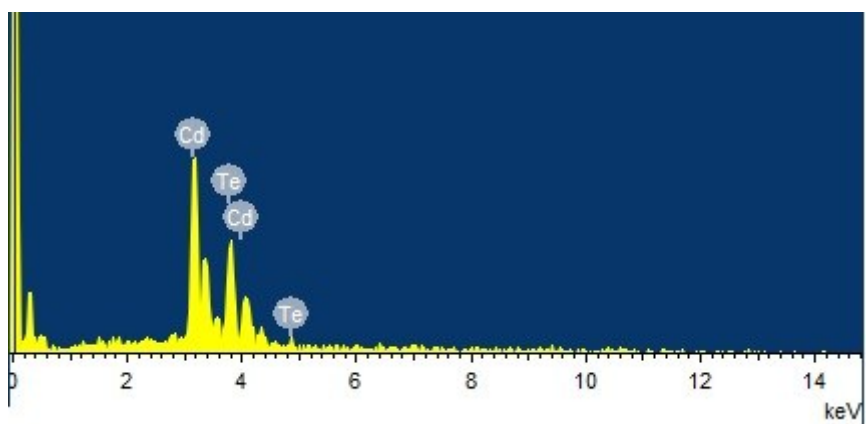

**Fig. S3** EDX spectrum of CdTe QDs

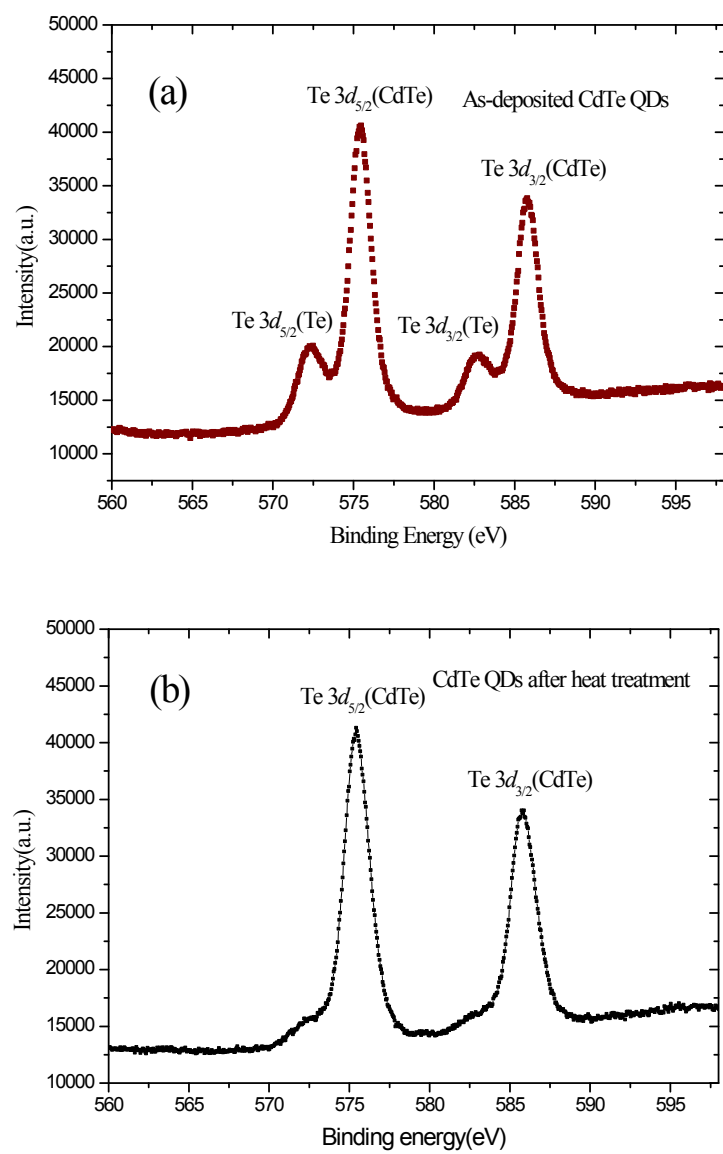

**Fig. S4** XPS spectra of Te for CdTe QDs before (a) and after (b) thermal treatment

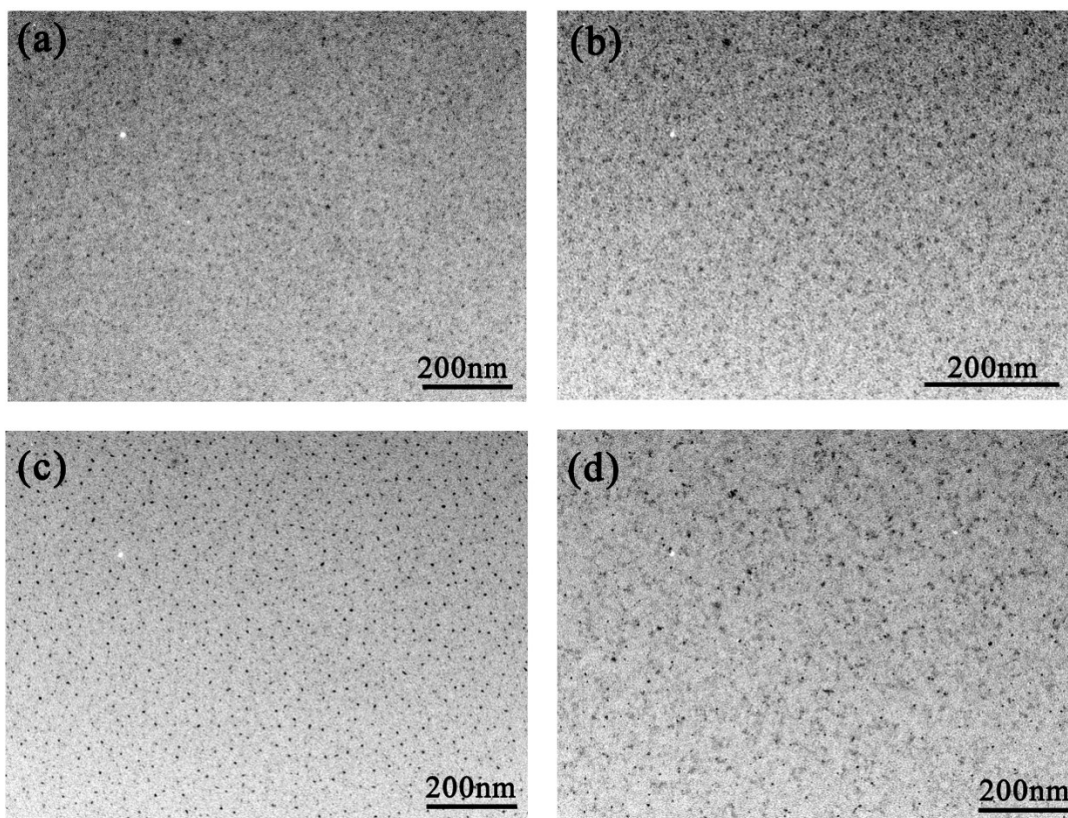

**Fig. S5** TEM images of CdTe QDs deposited for 10 s (a), 20 s (b), 30 s (c), and 40 s (d) after thermal treatment at 170 °C for 40 min.

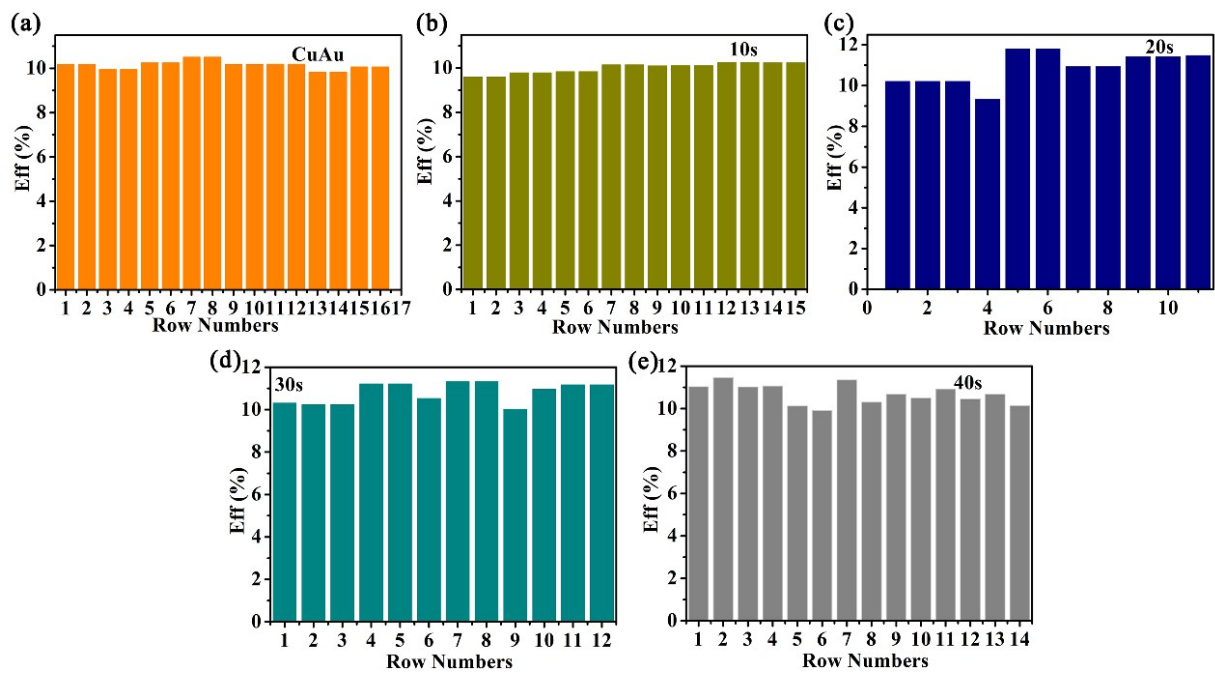

**Fig. S6** Average Eff for a batch of CdTe devices with Cu and CdTe QDs deposited with different time as buffer layers after thermal treatment

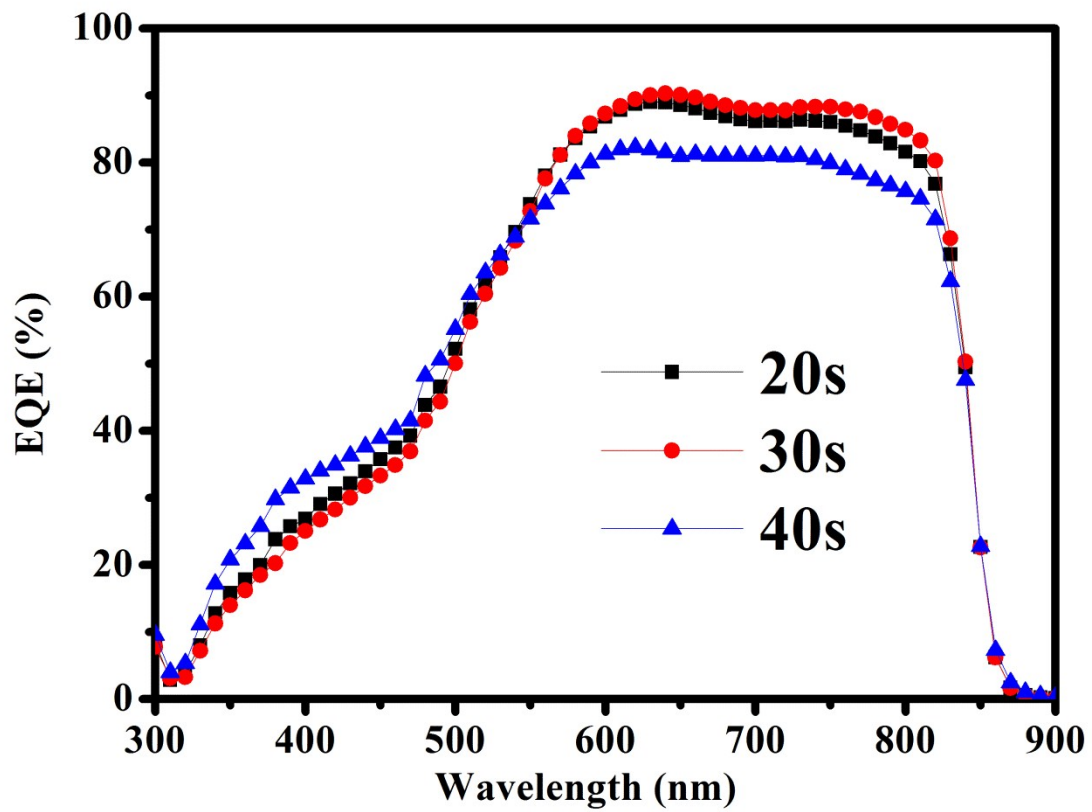

**Fig. S7 (a)**EQE curves for CdTe cells with CdTe QDs deposited for 20, 30, and 40s as buffer layers.



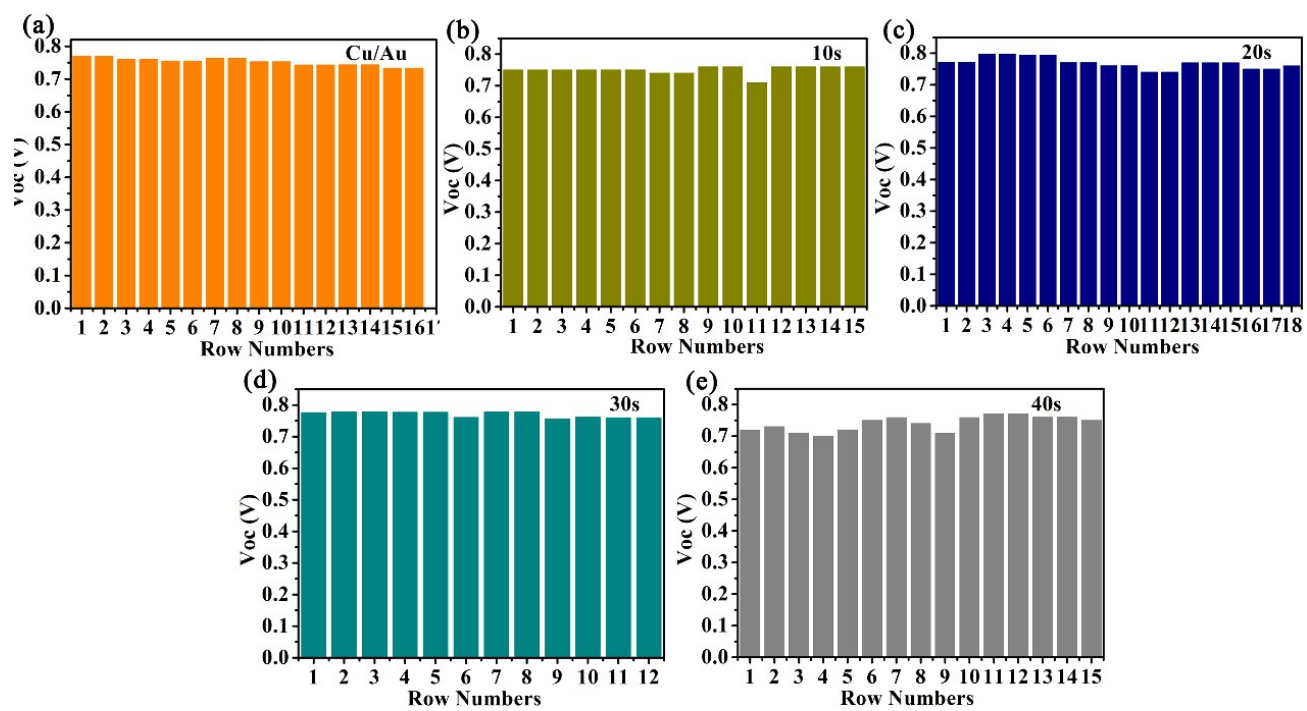

**Fig. S8** Average  $V_{oc}$  for more than 14 CdTe devices with Cu and CdTe QDs deposited with different time as buffer layers after thermal treatment

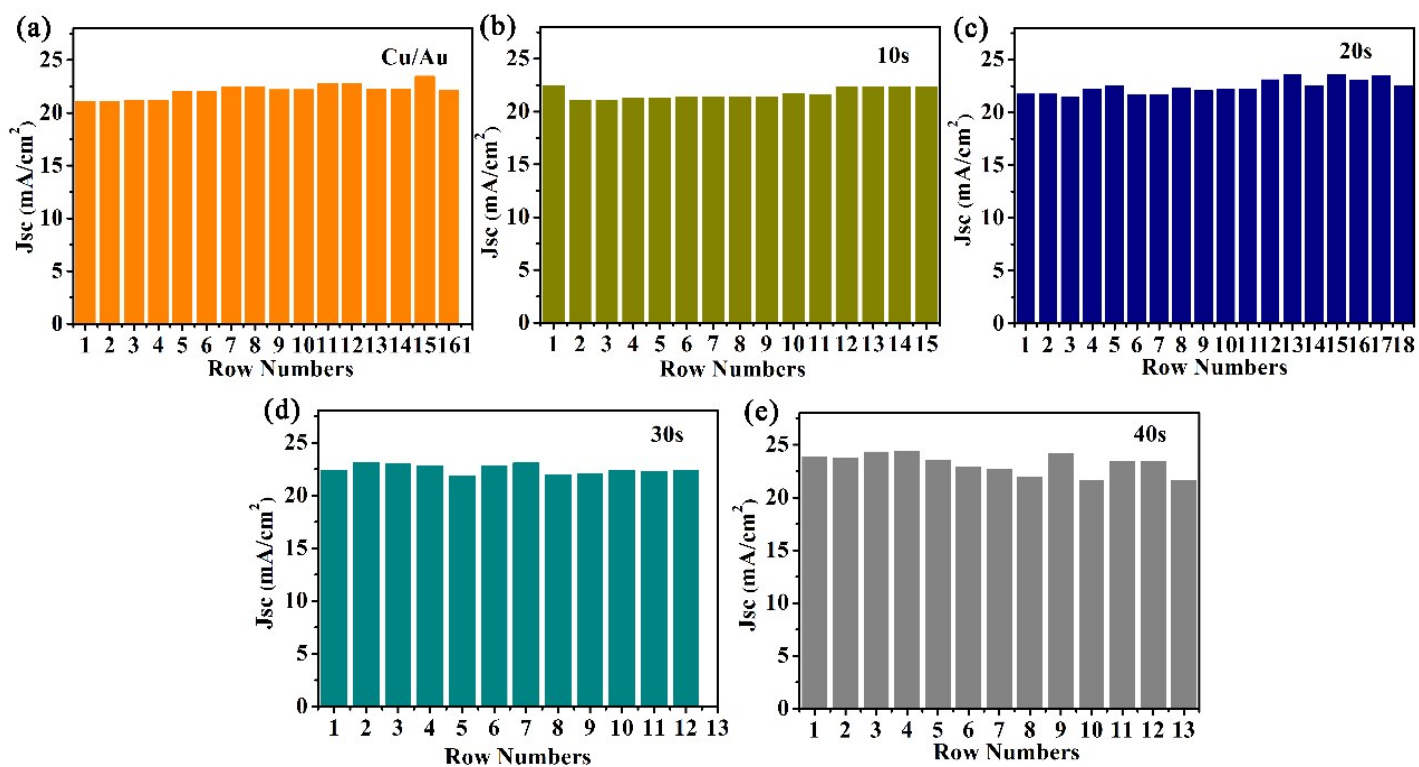

**Fig. S9** Average  $J_{SC}$  for more than 14 CdTe devices with Cu and CdTe QDs deposited with different time as buffer layers after thermal treatment

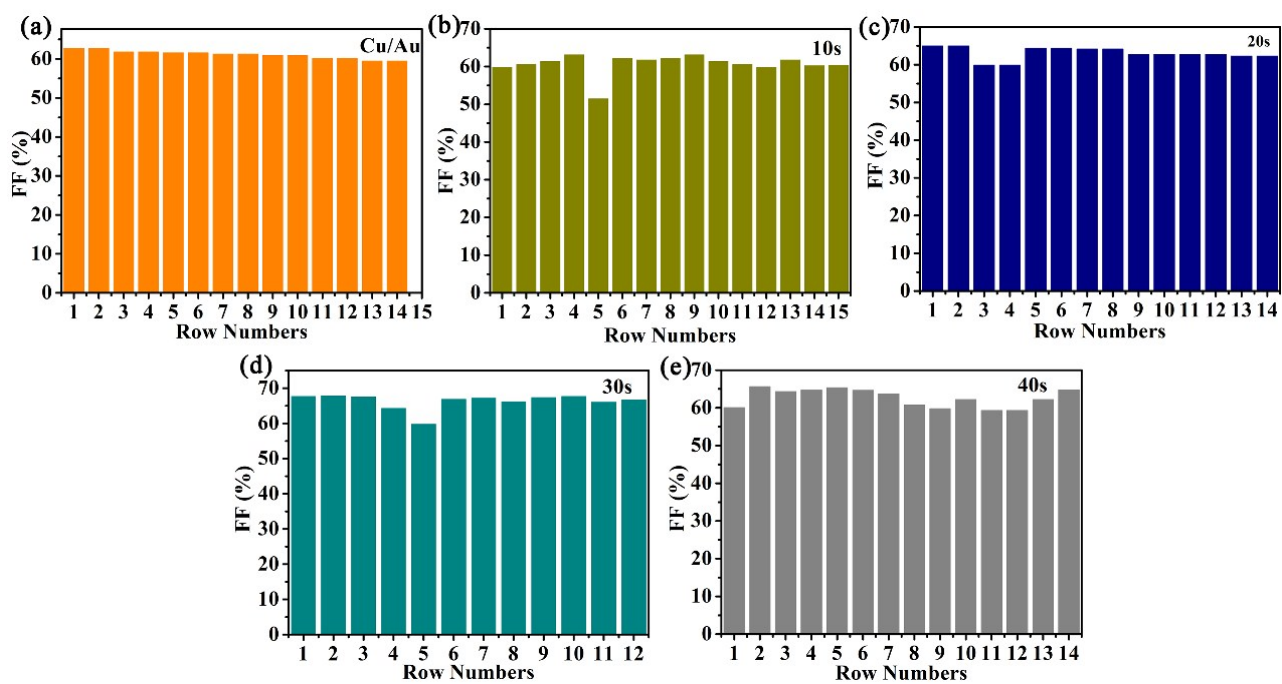

**Fig. S10** Average FF for more than 14 CdTe devices with Cu and CdTe QDs deposited with different time as buffer layers after thermal treatment

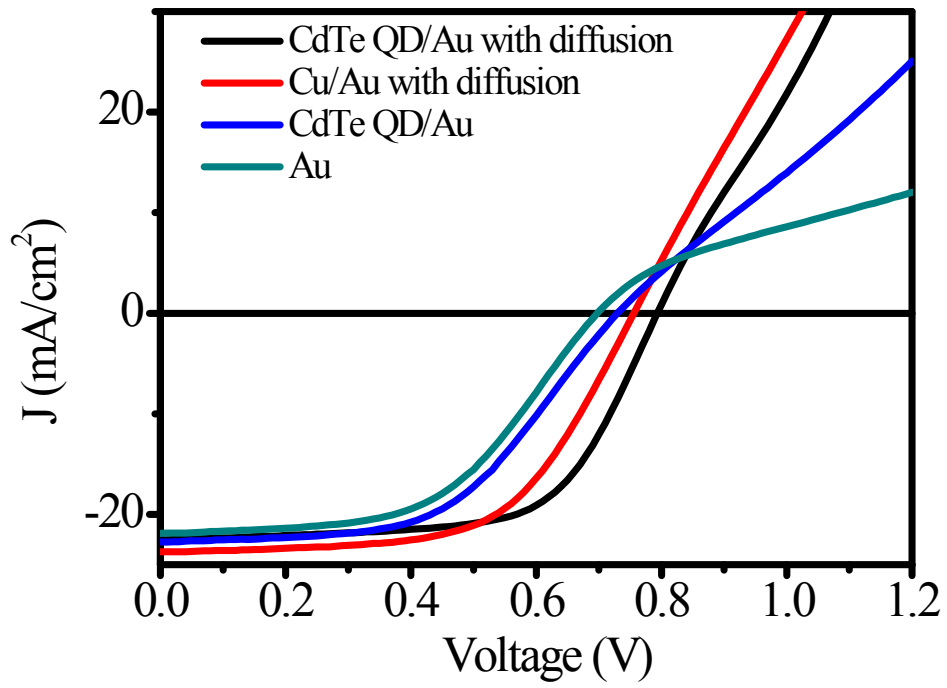

**Fig. S11** I-V curves of CdTe cells with CdTe QDs/Au and copper/Au without and with diffusion

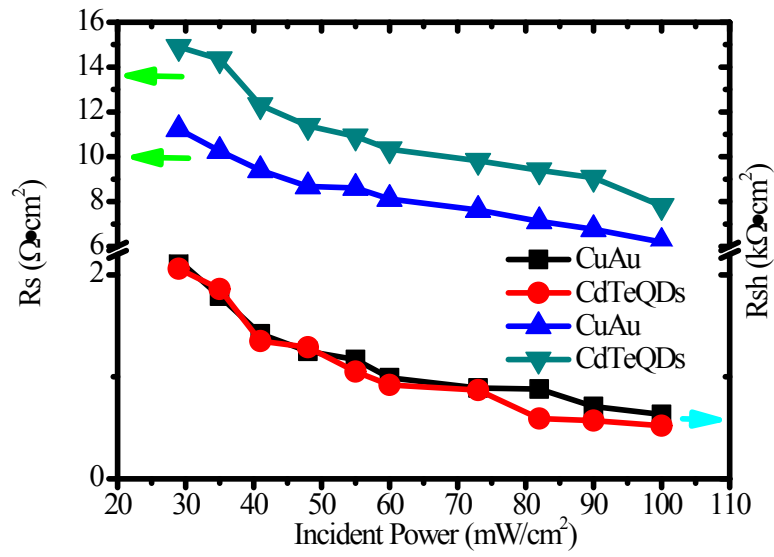

**Fig. S12** The dependence of  $R_s$  for CdTe cell with CdTe QDs and Cu as buffer layers

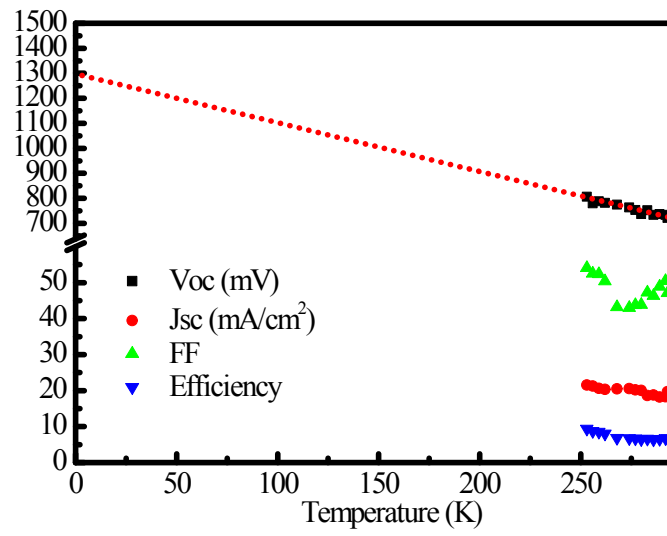

**Fig. S13** Voc, Jsc, FF, and Eff as a function of temperature for CdTe cell with CdTe QDs as buffer layer

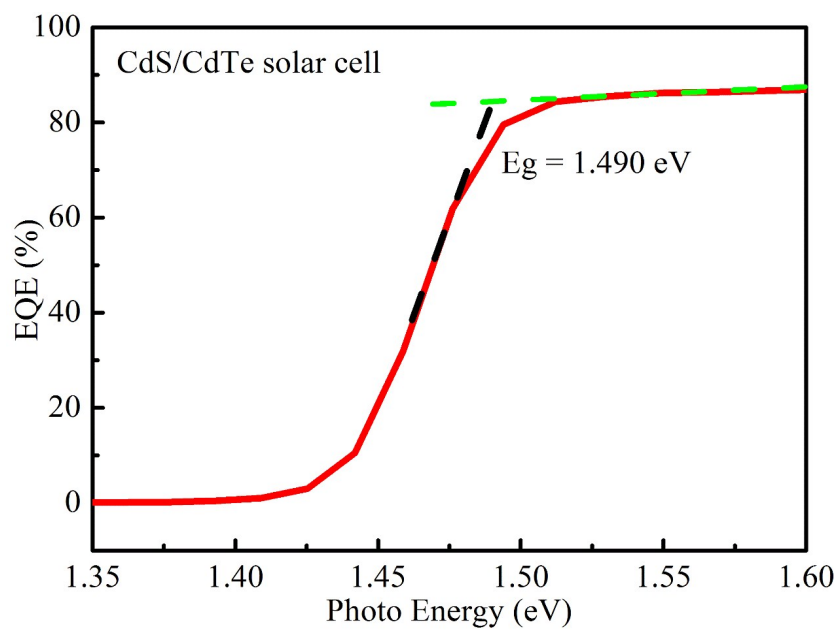

**Fig. S14** The band gap of CdTe determined from the EQE curve, the band gap of CdTe is  $\sim 1.49$  eV

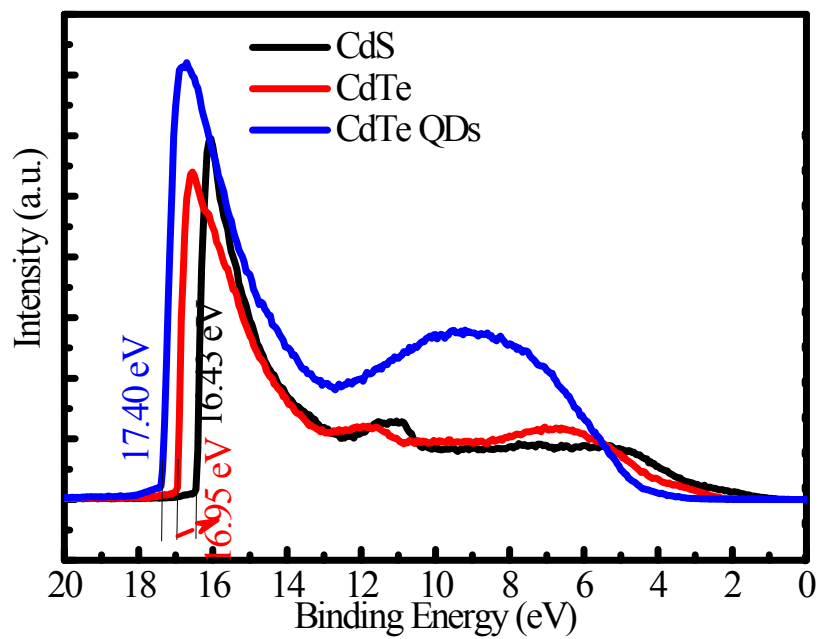

**Fig. S15** Ultraviolet photoelectron spectrometer (UPS) of CdS, CdTe, and CdTe QDs



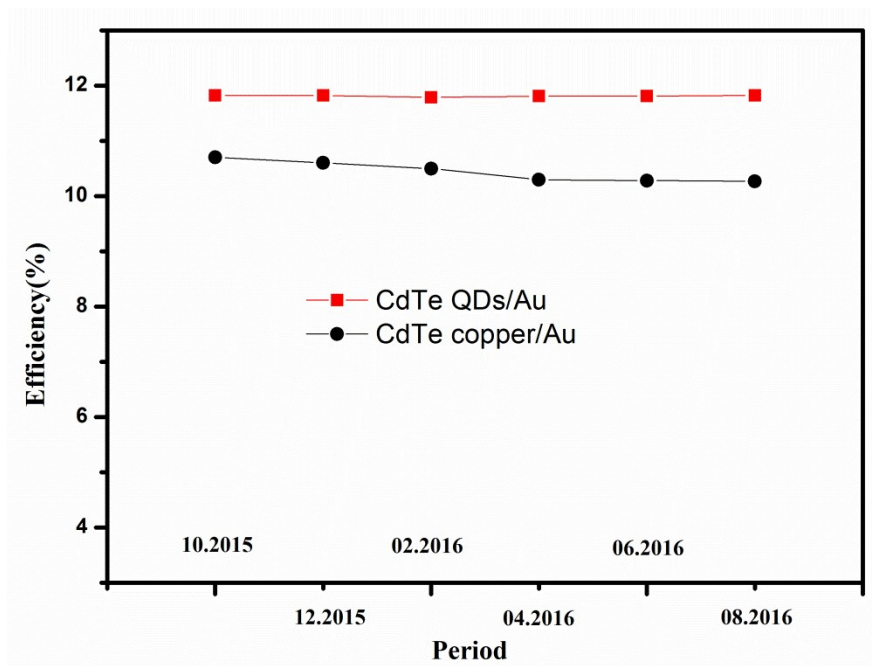

**Fig. S16** Efficiency degradation for both CdTe QDs and copper contacted devices as a function of the time from October, 2015 to August, 2016.

**Table S1** Summary of the growth condition for both CdS and CdTe

| <b>Content</b>                             | <b>CdS:O</b>     | <b>CdTe</b> |
|--------------------------------------------|------------------|-------------|
| <b>Temperature (°C)</b>                    | Room temperature | 272 °C      |
| <b>Target-Substrate distance (cm)</b>      | 12               | 12          |
| <b>RF power density (W/cm<sup>2</sup>)</b> | 0.88             | 1.32        |
| <b>Ar (SCCM)</b>                           | 28.3             | 28.3        |
| <b>Deposition pressure (Pa)</b>            | 3                | 2           |
| <b>Oxygen (SCCM)</b>                       | 0.25             | 0           |
| <b>Thickness (μm)</b>                      | 0.1              | 2.0~2.3     |
